# Supplementary material for: Caveolin-1 promotes Ewing sarcoma metastasis regulating MMP-9 expression through MAPK/ERK pathway
Source: PubMed Central journal article supplement (PMC5302960; doi:10.18632/oncotarget.10872), 2016-07-28
Supplement: oncotarget-07-56889-s001.pdf [file oncotarget-07-56889-s001.pdf]

## Caveolin-1 promotes Ewing sarcoma metastasis regulating MMP-9 expression through MAPK/ERK pathway

### SUPPLEMENTARY FIGURES AND TABLES

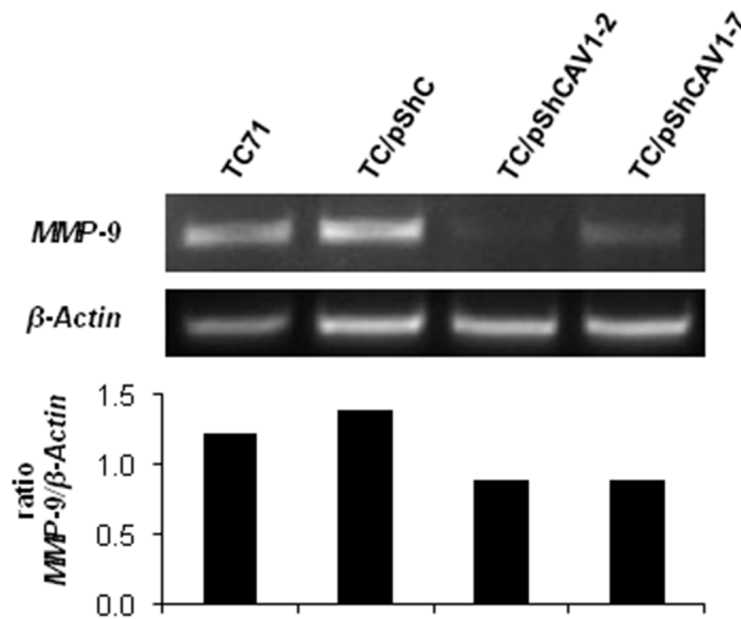

**Supplementary Figure S1: MMP-9 expression in TC71 CAV1-silenced cells.** Semi-quantitative RT-PCR and corresponding quantification showing *MMP-9*/ *$\beta$ -Actin* ratio in the TC71 shCAV1 model.

| p-RPS6 (n=26) | Stage     |            | Tumor size |      | Tumor site |           |
|---------------|-----------|------------|------------|------|------------|-----------|
|               | Localized | Metastatic | <8cm       | >8cm | Axial      | Extremity |
| Negative      | 8         | 6          | 4          | 10   | 9          | 5         |
| Positive      | 10        | 2          | 5          | 7    | 7          | 5         |

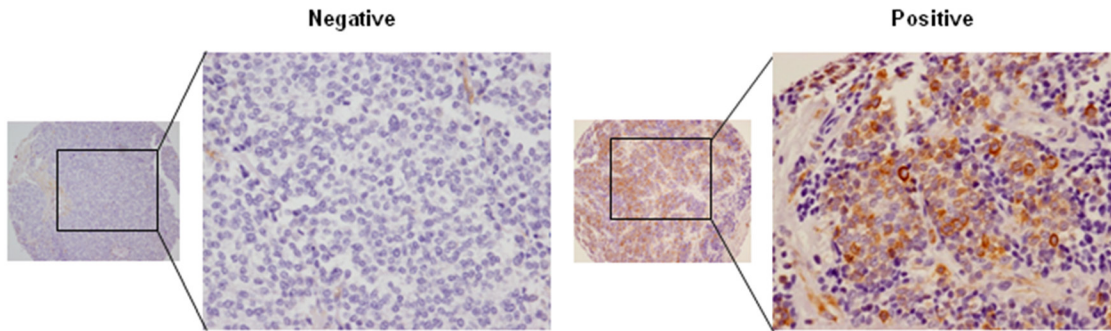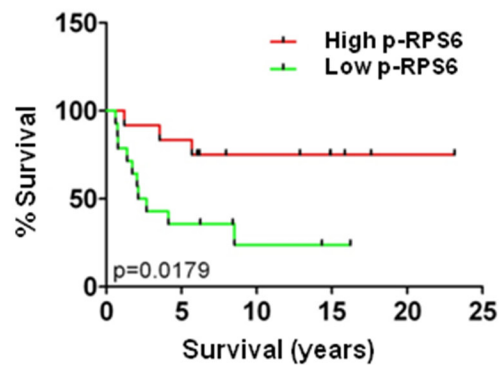

**Supplementary Figure S2: High phosphorylation levels of RPS6 are a good prognostic marker in ES tumors.** Above: Summary of TMA data with regard to p-RPS6 expression (negative *versus* positive) and clinical features. Middle: Example of negative and positive p-RPS6 staining of ES patient samples from the TMA (magnification,  $\times 40$ ; insert,  $\times 400$ ). Survival curve showed a positive correlation between high level of p-RPS6 and patient survival. Survival curve was generated by Kaplan-Meier method and compared by using the log rank test.



**Supplementary Table S1: Table shows the most significant receptor tyrosine kinase (RTK) up and downregulated in A673 CAV1-silenced cells**

| UniGene                                         | GeneBank | Symbol        | Description                                         | Phosphorylation site detected | Gene name                       |
|-------------------------------------------------|----------|---------------|-----------------------------------------------------|-------------------------------|---------------------------------|
| Proteins inhibited in CAV1 knockdown A673 cells |          |               |                                                     |                               |                                 |
| Hs.171596                                       | BC037166 | <b>EphA2</b>  | Ephrin type-A receptor 2                            | pan-Tyr                       | EphA2                           |
| Hs.350321                                       | X15262   | <b>Ret</b>    | Proto-oncogene tyrosine-protein kinase receptor Ret | pan-Tyr                       | RET, CDHF12, CDHR16, PTC, RET51 |
| Hs.408073                                       | M77232   | <b>S6</b>     | 40S ribosomal protein S6                            | Ser 235/236                   | RPS6, OK/SW-cl.2                |
| Hs.861                                          | EU332853 | <b>ERK1</b>   | Mitogen-activated protein kinase 3                  | Thr202/Tyr204                 | MAPK3, ERK1, PRKM3              |
| Hs.195659                                       | CH471077 | <b>Src</b>    | Proto-oncogene tyrosine-protein kinase Src          | pan-Tyr                       | SRC                             |
| Proteins activated in CAV1 knockdown A673 cells |          |               |                                                     |                               |                                 |
| Hs.525622                                       | AB451242 | <b>AKT1</b>   | RAC-alpha serine/threonine-protein kinase           | Thr 308                       | AKT1, PKB, RAC                  |
| Hs.352548                                       | BC126481 | <b>IGF-IR</b> | IGF-like family receptor 1                          | pan-Tyr                       | IGFLR1                          |

**Supplementary Table S2: Tissue microarray patient (TMA) dataset**

See Supplementary File 1
